# Supplementary material
Source: PubMed Central journal article supplement (PMC7682387)
Supplement: pnas.2010199117.sapp.pdf [file pnas.2010199117.sapp.pdf]

1 **Supplemental Information Appendix 1: Figures and Legends**

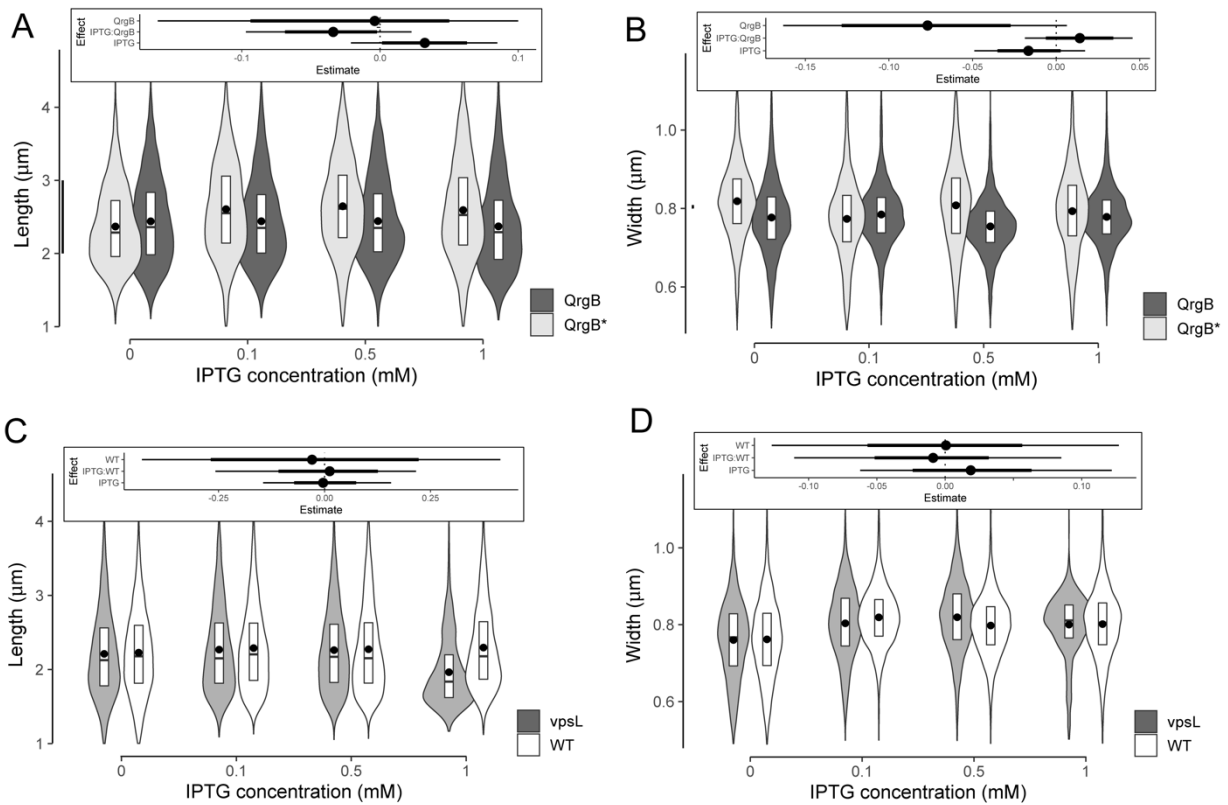

2 **Supplemental Figure 1: C-di-GMP and IPTG Do Not Significantly Alter Cell Length or Width**  
 3 **in WT or  $\Delta vpsL$  Backgrounds.** Distributions of cell length (A, C) and width (B,D) as a function  
 4 of IPTG concentration in populations grown to early stationary phase ( $OD_{600} = 1.3$ ) expressing  
 5 inactive DGC (QrgB\*, light) or active DGC (QrgB, dark). Panels A and B are the  $\Delta vpsL$  strain  
 6 expressing QrgB\* or QrgB while panels C and D are the WT and  $\Delta vpsL$  backgrounds with no  
 7 vector. The box represents the first, second, and third quartiles. The dot represents the mean.  
 8 Each distribution represents between 1,000 and 1,200 cells analyzed and pooled from two to  
 9 three separate experiments. Insert) Estimated effects of QrgB expression and IPTG on the  
 10 population medians for each morphological parameter. (dot = mean, thick line = 90% CI, thin line  
 11 = 98% CI).

12

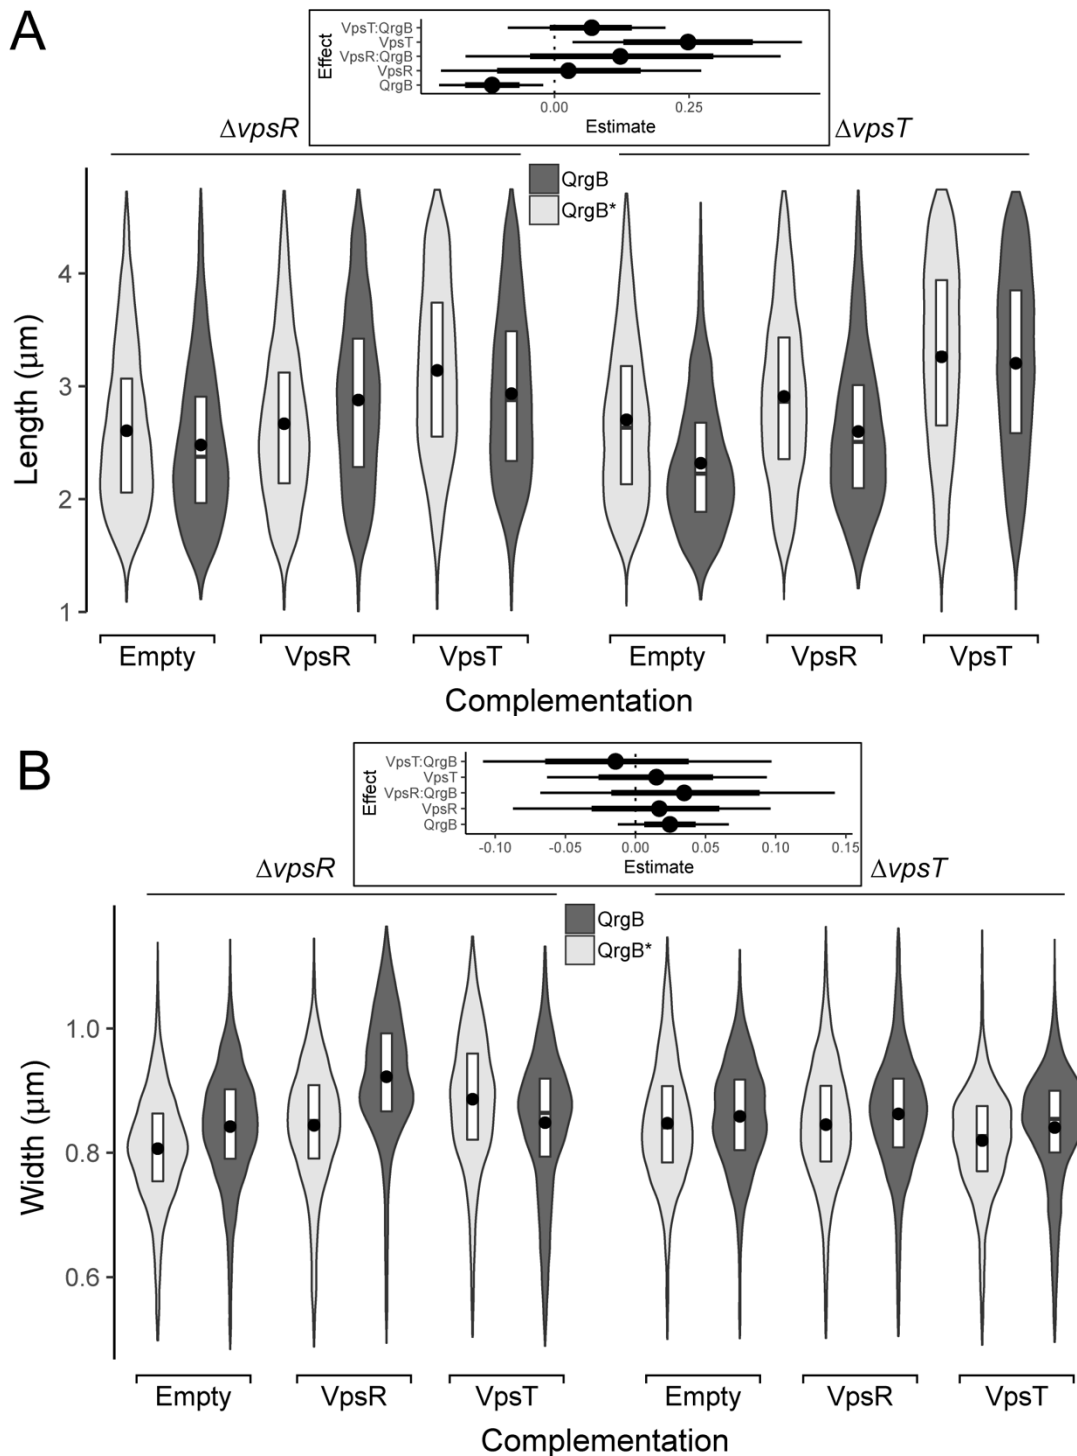

13 **Supplementary Figure 2: Length and Width Measurements from VpsR and VpsR**  
 14 **Complementation.** Length (A) and width (B) measurements from the same cells as Figure 2.  
 15 Insert) Estimated effects of QrgB expression and IPTG on the population median for each  
 16 morphological parameter. (dot = mean, thick line = 90% CI, thin line = 98% CI).

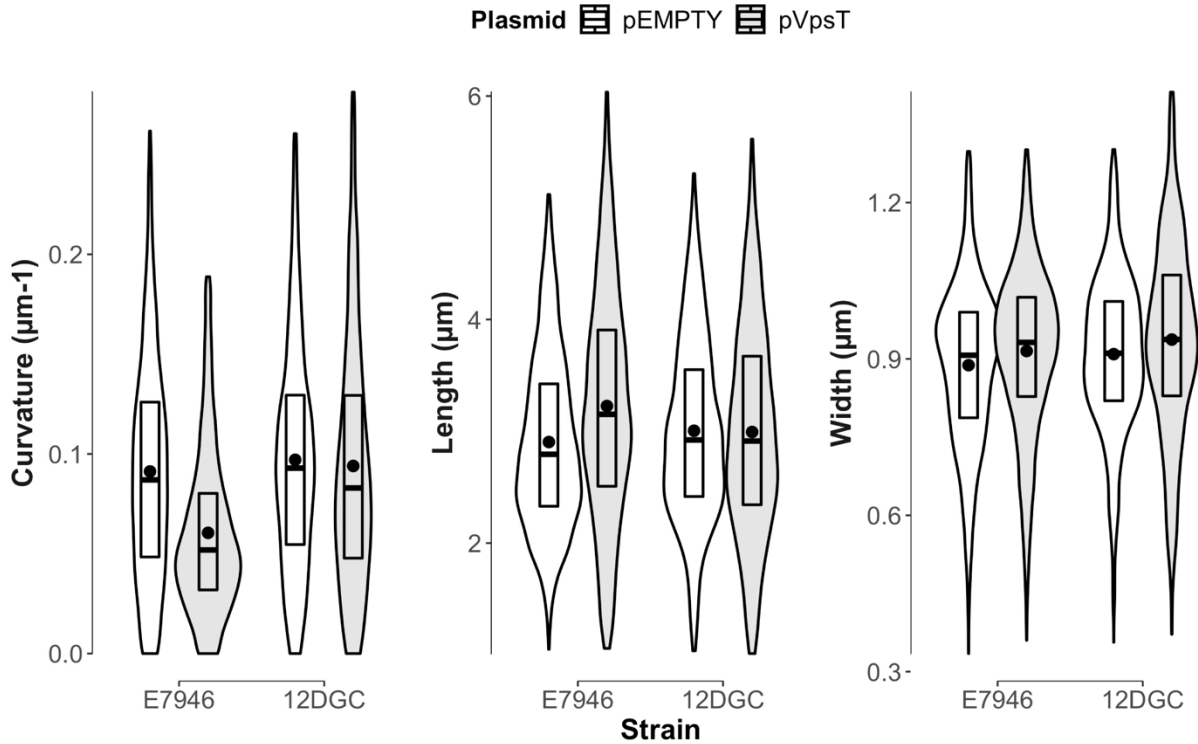

18 **Supplementary Figure 3: VpsT Overexpression in the D12 *V. cholerae* E7946 DGC Mutant.**

19 VpsT (grey) and the empty vector (pEMPTY, white) was overexpressed in the WT E7946 strain  
 20 and D12 E7946 *V. cholerae* mutant and curvature (A), length (B), and width (C) were measured.  
 21 Violin plots represent the distributions from three biological replicates, boxplots show 25th,  
 22 and 75th percentile, and dots represent the mean.

23

24

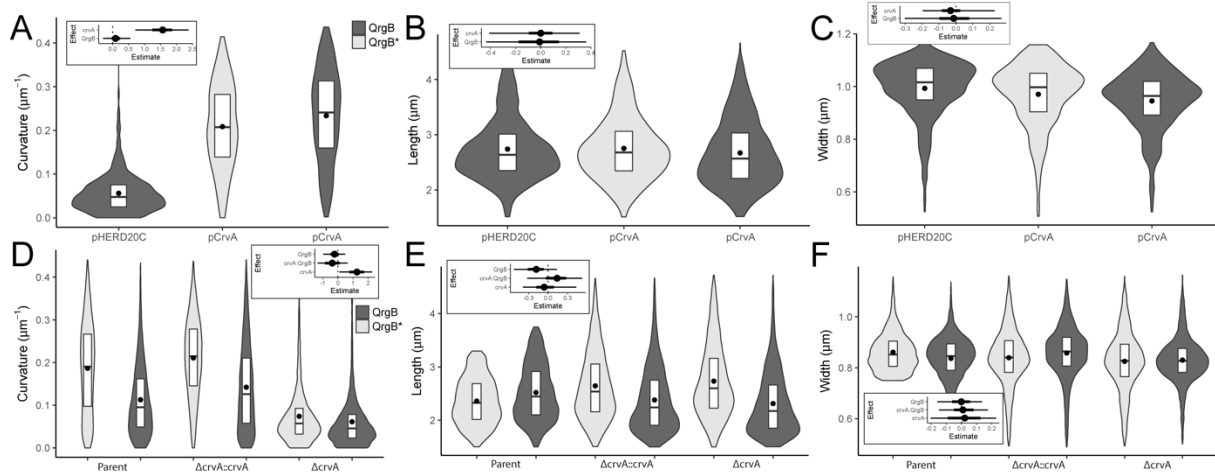

25

26 **Supplemental Figure 4: Complementation of  $\Delta crvA$  Restores Curvature. Plasmid**  
 27 **Complementation.** Distributions of cell curvature (A), length (B), and width (C) from  $\Delta crvA$  strains  
 28 complemented with the control vector (pHERD20C) or CrvA (pCrVA) expressing an inactive DGC  
 29 (QrgB\*, light) or active DGC (QrgB, dark) in early stationary phase ( $OD_{600}=1.3$ ) populations  
 30 supplemented with 100  $\mu M$ . **Chromosomal Integration Complementation.** Distributions of cell  
 31 curvature, length, and width of either parent,  $\Delta crvA$ , and  $\Delta crvA$  complemented with a single copy  
 32 of CrvA driven by its native promoter integrated at the VC1807 locus ( $\Delta crvA$  VC1807::pcrvA-crvA)  
 33 harboring QrgB\* (light) or QrgB (dark). Cultures were grown to early stationary phase ( $OD_{600} =$   
 34 1.3) in the presence of 100  $\mu M$  IPTG. Inserts) Estimated effects of QrgB expression and crvA on  
 35 the population median for each morphological parameter. (dot = mean, thick line = 90% CI, thin  
 36 line = 98% CI).

37

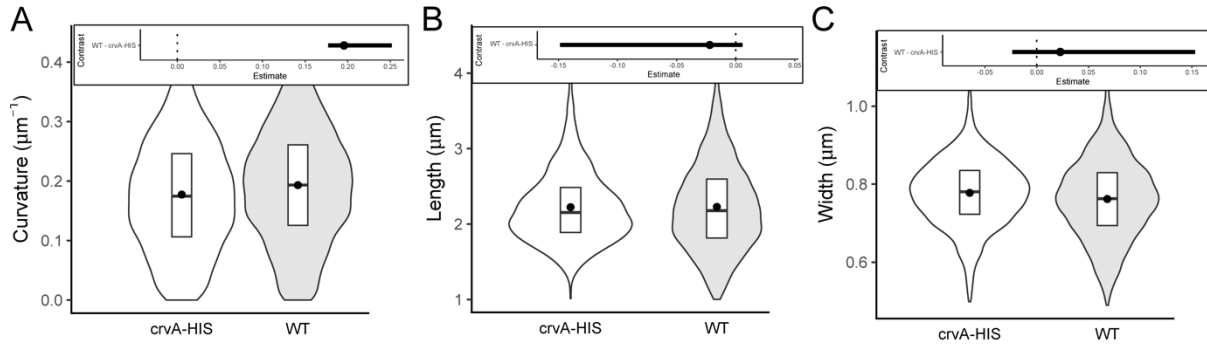

38 **Supplemental Figure 5: Cell Shape Parameters for WT and CrvA-HIS backgrounds.**  
 39 Curvature (A), length (B), and width (C) were measured in WT and CrvA-HIS backgrounds.  
 40 Cultures were grown to early stationary phase ( $\text{OD}_{600} \sim 1.3$ ) and imaged by phase microscopy.  
 41 Insert) Estimated differences in the population medians of each morphological parameters  
 42 between mutant strains. (dot = mean, thick line = 90% CI, thin line = 98% CI).  
 43

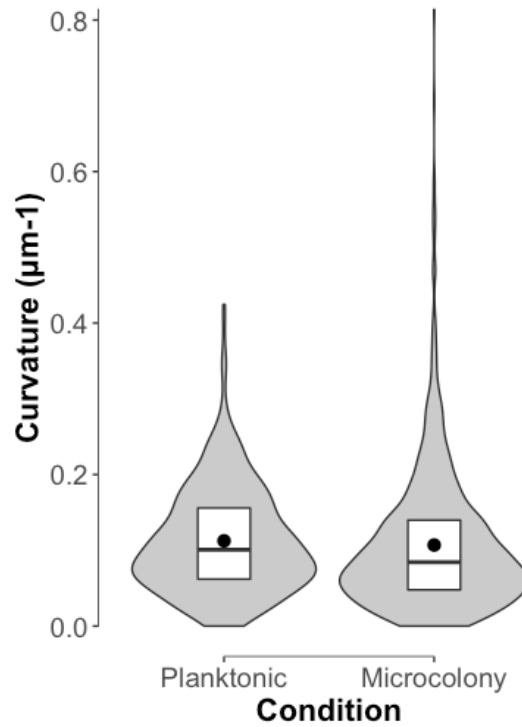

44 **Supplemental Figure 6: Cell Shape Curvature of Surface Attached and Planktonic Cells.**  
45 Curvature of in the planktonic phase or cells attached to the surface (Microcolony) was  
46 measured for the WT strain at 8 hours following the conditions described for Fig. 5. Violin plots  
47 represent the curvature distributions for two to three replicates, boxplots represent 25th, 50th,  
48 and 75th percentiles, and dots represent the mean curvature.

49

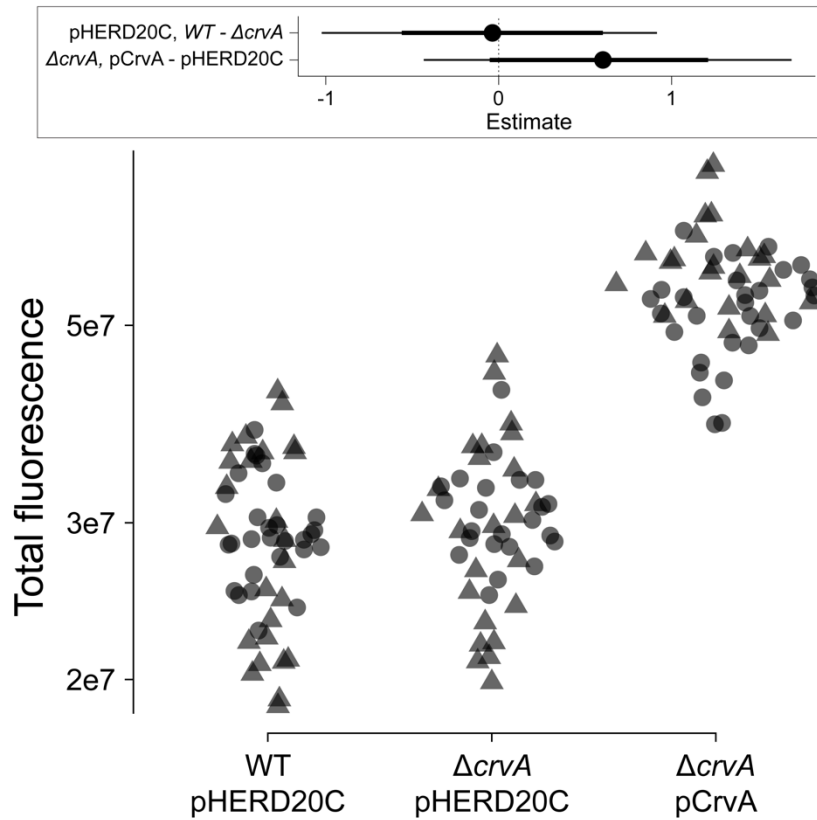

50 **Supplemental Figure 7: Effect of Curvature on Surface Coverage.** Total fluorescence  
 51 intensities from stained cells (FM4-64) attached to a glass surface for different strains. Each dot  
 52 represents one field of view. Dot shapes represents independent replicates. Insert) Estimate of  
 53 the differences in the means explained by *crvA* and pCrvA (dot = mean, thick line = 90% CI, thin  
 54 line = 98% CI).

55

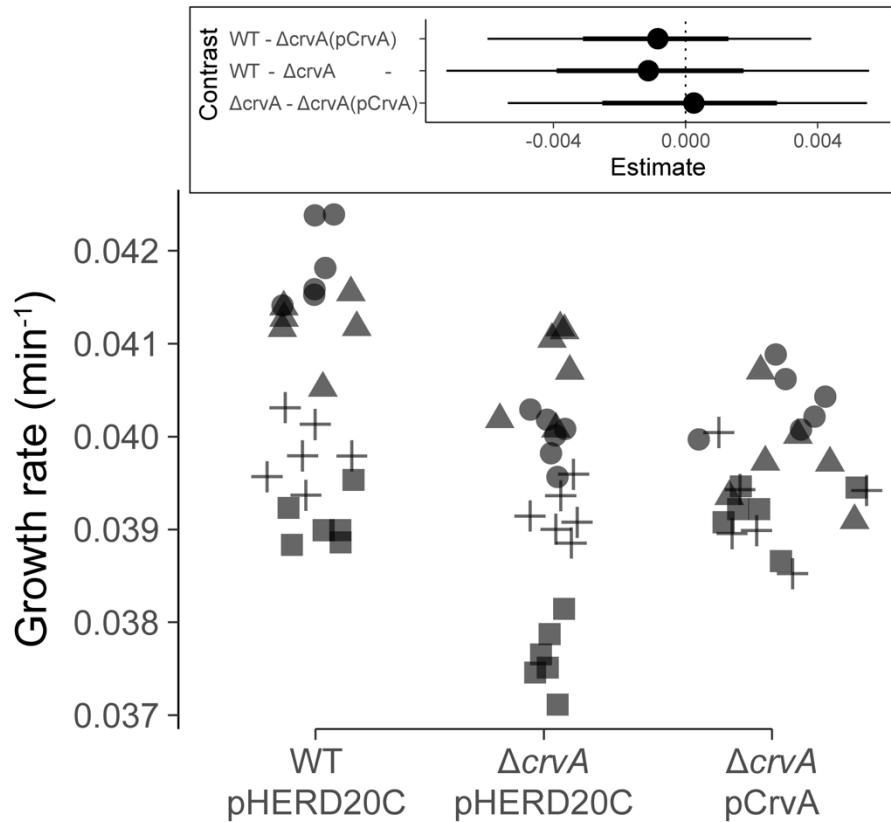

56

57 **Supplemental Figure 8: WT, Straight, and Curved Populations Have Indistinguishable**  
 58 **Growth Rates.** Each shape represents an independent trial with six biological replicates. Insert)  
 59 Estimate of the differences in the means between WT-pHERD20C and  $\Delta crvA$ -pCrvA, WT-  
 60 pHERD20C and  $\Delta crvA$ -pHERD20C, and  $\Delta crvA$ -pHERD20C and  $\Delta crvA$ -pCrvA (dot = mean, thick  
 61 line = 90% CI, thin line = 98% CI).

62



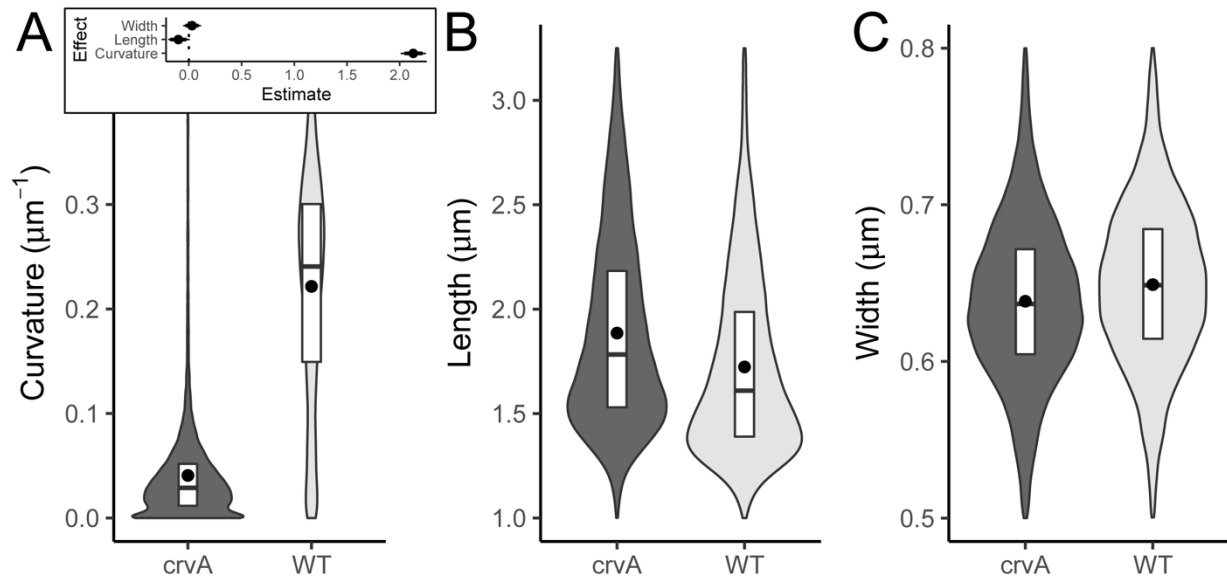

63 **Supplemental Figure 9: Cell shape Parameters of WT and  $\Delta crvA$  (*crvA*) cells.** Curvature  
 64 (A), length (B), and width (C) measurements of cells grown to early stationary phase in M9  
 65 pyruvate. Insert) Estimated effect of *crvA* deletion on populations medians for each  
 66 morphological parameter. (dot = mean, thick line = 90% CI, thin line = 98% CI).  
 67

68

69 **Supplemental Information Appendix 2: Strains, Plasmids, and Oligonucleotides**70 **Supplemental Table 1: Strains Used in this Study**

71

| Strain                         | Description                                                                                                                                                                                                                                                                                                                                                                                            | Reference  |
|--------------------------------|--------------------------------------------------------------------------------------------------------------------------------------------------------------------------------------------------------------------------------------------------------------------------------------------------------------------------------------------------------------------------------------------------------|------------|
| <b><i>Escherichia coli</i></b> |                                                                                                                                                                                                                                                                                                                                                                                                        |            |
| S17- $\lambda$ pir             | Tpr Smr <i>recA thi pro hsdR17</i> (r <sub>K</sub> <sup>-</sup> m <sub>K</sub> <sup>+</sup> ) RP4::2-Tc::Mu Km<br>Tn7 $\lambda$ pir                                                                                                                                                                                                                                                                    | Lab stock  |
| <b><i>Vibrio cholerae</i></b>  |                                                                                                                                                                                                                                                                                                                                                                                                        |            |
| C6706                          | Wild Type                                                                                                                                                                                                                                                                                                                                                                                              | Lab Stock  |
| CW2034                         | C6706 $\Delta$ <i>vpsL</i>                                                                                                                                                                                                                                                                                                                                                                             | (11)       |
| JC1195                         | CW2034 $\Delta$ <i>vpsT</i>                                                                                                                                                                                                                                                                                                                                                                            | (14)       |
| WN310                          | CW2034 $\Delta$ <i>vpsR</i>                                                                                                                                                                                                                                                                                                                                                                            | (14)       |
| NF6                            | CW2034 $\Delta$ <i>crvA</i>                                                                                                                                                                                                                                                                                                                                                                            | This study |
| NF7                            | $\Delta$ <i>crvA</i>                                                                                                                                                                                                                                                                                                                                                                                   | This study |
| NF8                            | CW2034 $\Delta$ <i>crvA</i> VC1807::P <sub><i>crvA</i></sub> - <i>crvA</i>                                                                                                                                                                                                                                                                                                                             | This study |
| NF9                            | CW2034 <i>crvA</i> :: <i>crvA</i> -HIS                                                                                                                                                                                                                                                                                                                                                                 | This study |
| E7946 Sm <sup>R</sup>          | Wild Type                                                                                                                                                                                                                                                                                                                                                                                              | (30)       |
| $\Delta$ 12DGC                 | $\Delta$ VCA0956, $\Delta$ VCA1599, $\Delta$ VCA2454, $\Delta$ VCA1104, $\Delta$ VCA0939, $\Delta$ VCA0074,<br>$\Delta$ VCA2224, $\Delta$ VCA1376, $\Delta$ VCA1067, $\Delta$ VCA1216, $\Delta$ VCA0697, $\Delta$ VCA2285, P <sub><i>tac</i></sub> -<br><i>tfoX</i> $\Delta$ <i>recJ</i> 501bp, $\Delta$ <i>exoVII</i> 501bp, $\Delta$ <i>lacZ</i> :: <i>lacIq</i> , $\Delta$ VCA1807::Tm <sup>R</sup> | (30)       |

72

73

74 **Supplemental Table 2: Plasmids Used in this Study**

| Plasmid        | Description                                                                                              | Reference      |
|----------------|----------------------------------------------------------------------------------------------------------|----------------|
| pBBRlux        | <i>luxABCDE</i> containing promoter-less plasmid, Cam <sup>R</sup>                                       | Lab collection |
| pEVS143        | <i>pTac</i> overexpression vector, Kan <sup>R</sup>                                                      | (66)           |
| pKAS32         | Sucide vector for mutant construction, Amp <sup>R</sup>                                                  | (53)           |
| pBRP333        | Control expression vector, Kan <sup>R</sup>                                                              | (20)           |
| pBRP1          | <i>qrgB</i> * (inactive DGC) cloned into expression vector pMMB67Eh, Amp <sup>R</sup>                    | (20)           |
| pBRP2          | <i>qrgB</i> (active DGC) cloned into expression vector, pMMB67Eh, Amp <sup>R</sup>                       | (20)           |
| pCMW131        | <i>vpsR</i> in pEVS143, Kan <sup>R</sup>                                                                 | (23)           |
| pCMW132        | <i>vpsT</i> in pEVS143, Kan <sup>R</sup>                                                                 | (23)           |
| pHERD20T       | <i>P<sub>BAD</sub></i> Expression vector                                                                 | (67)           |
| pNF057         | pHERD20T <i>pBAD</i> expression vector with Cam <sup>R</sup> replacing Amp <sup>R</sup>                  | (24)           |
| pNF069         | 358 bp upstream of ATG of <i>crvA</i> ( <i>P<sub>crvA</sub></i> ) in pBBRlux                             | This study     |
| pNF070         | Deletion construct for <i>crvA</i> in pKAS32, Amp <sup>R</sup>                                           | This study     |
| pNF071         | VC1807 knock-in construct, Amp <sup>R</sup>                                                              | This study     |
| pNF072         | VC1807 knock-In construct with CrvA driven by native promoter <i>P<sub>crvA</sub></i> , Amp <sup>R</sup> | This study     |
| pNF073 (pCrvA) | CrvA from C6706 gDNA into pNF057                                                                         | This study     |

75

76

**Supplemental Table 3: Oligonucleotides Used in this Study**

| Oligo Name                                      | 5' Overhang                          | Gene Specific            |
|-------------------------------------------------|--------------------------------------|--------------------------|
| <b>Vector Construction</b>                      |                                      |                          |
| pNF069_For <sup>1</sup>                         | cggtgccgcccgcctctagaa                | GGTATCTCAAATTGCTTCAAAC   |
| pNF069_Rev <sup>2</sup>                         | ccatthttgcccgcgaactagag              | AAAGTGGGAAAGACAAAC       |
| pNF070_US_For <sup>3</sup>                      | tgccgatgctagctatagtt                 | CAGTAGTAGCGGATCATC       |
| pNF070_US_Rev                                   | ttttgtgcgg                           | AAAGTGGGAAAGACAAAC       |
| pNF070_DS_For <sup>4</sup>                      | ttcccacttt                           | CCGCACAAAAATCCAACG       |
| pNF070_DS_Rev                                   | gtggaattcccgggagagct                 | TGGTGAAGCTGACTTTTTG      |
| pNF071_US_For                                   | tgccgatgctagctatagtt                 | ATTTTTTCAGTTGGCCTAC      |
| pNF071_US_Rev                                   | ttttgtgcgg                           | TAGTACCTCTATTGTAACTTG    |
| pNF071_DS_For                                   | ttcccacttt                           | TAGTCGAAAATAAAAAAAGAGG   |
| pNF071_DS_Rev                                   | gtggaattcccgggagagct                 | CGATGAGGATAAAAAACAC      |
| pNF072_For                                      | acaatagaggtgactaggta                 | GGTATCTCAAATTGCTTCAAAC   |
| pNF072_Rev                                      | cgactagagctcaccggtag                 | CTAGCTGTCTTTGTTTGG       |
| pNF073_For                                      | atctgataagaattcgagct                 | ATGTGGCTAAACATAAATATGTTG |
| pNF073_Rev                                      | tctagaggatccccgggtac                 | CTAGCTGTCTTTGTTTGG       |
| pNF074_US_For                                   | tgccgatgctagctatagtt                 | ATCGATGAGAAATTGAGTAAC    |
| pNF074_US_Rev                                   | -                                    | GCTGTCTTTGTTTGGTCTG      |
| pNF074_DS_For                                   | tcagaccaacaagacagccatcaccatcaccatcac | TAGCCGCACAAAAATCCAAC     |
| pNF074_DS_Rev                                   | gtggaattcccgggagagct                 | GCGAAACAGTACTGCGAG       |
| <b>qRT-PCR</b>                                  |                                      |                          |
| gyrA-For                                        | -                                    | AAATTCATCTTCATGGCAAC     |
| gyrA-Rev                                        | -                                    | GCGATGTTTTCTTCACAG       |
| crvA-For                                        | -                                    | GTACTIONCCGTTGAACTCGTATT |
| crvA-Rev                                        | -                                    | CCGTAATCACACGATTGTAGGT   |
| <sup>1</sup> For = Forward                      |                                      |                          |
| <sup>2</sup> Rev = Reverse                      |                                      |                          |
| <sup>3</sup> US - Amplifies Upstream Fragment   |                                      |                          |
| <sup>4</sup> DS - Amplifies Downstream Fragment |                                      |                          |
