# Supplementary material
Source: PubMed Central journal article supplement (PMC7682387)

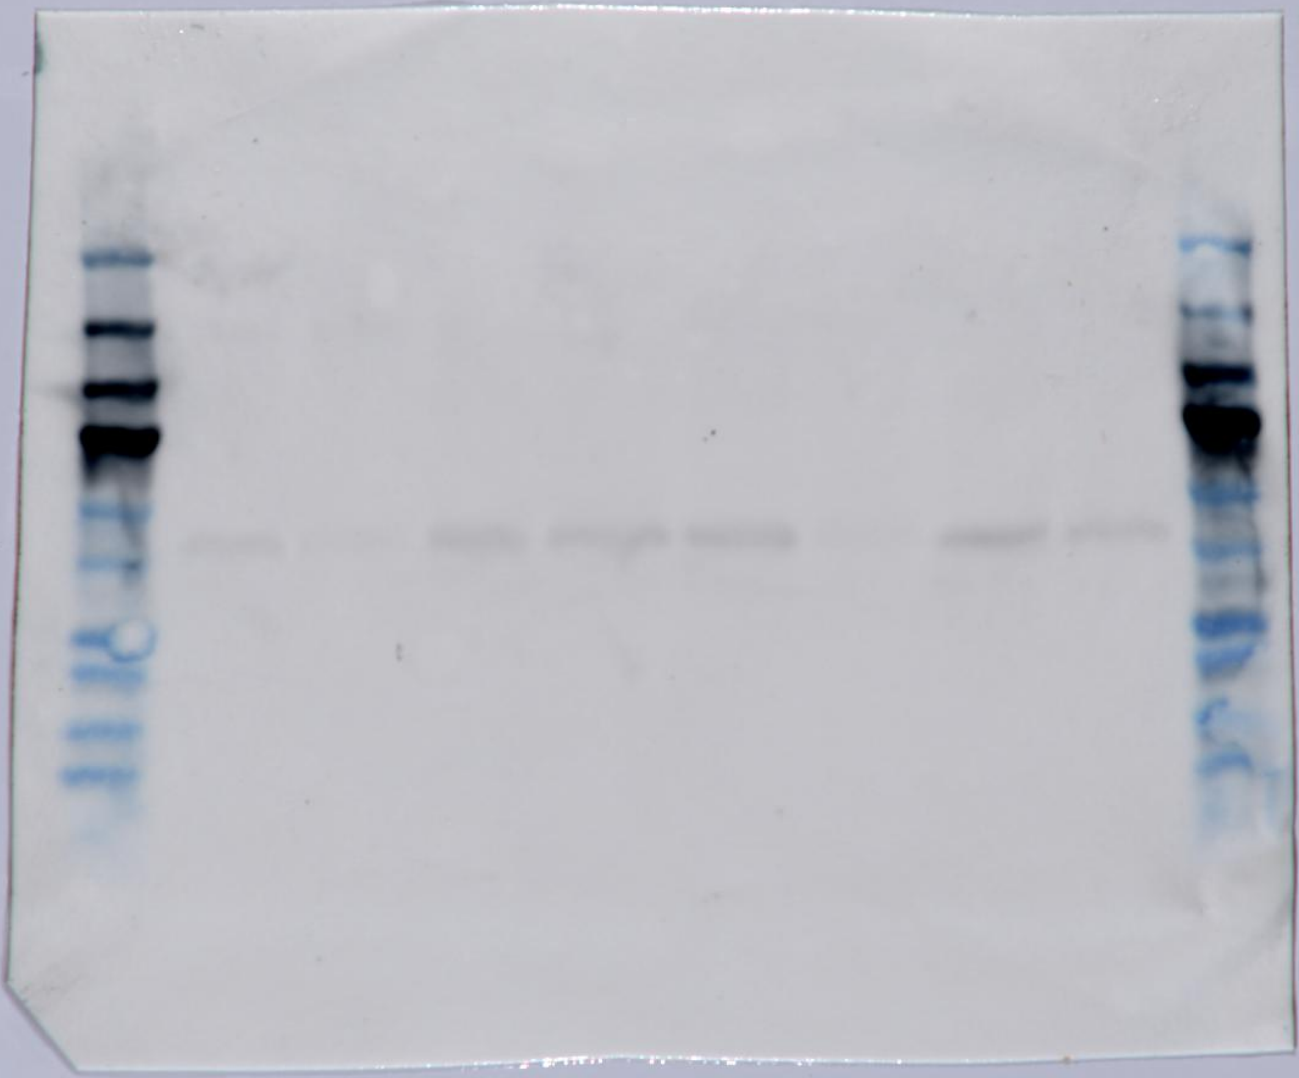

Supplement: pnas.2010199117.sd18.pdf [file pnas.2010199117.sd18.pdf]

91

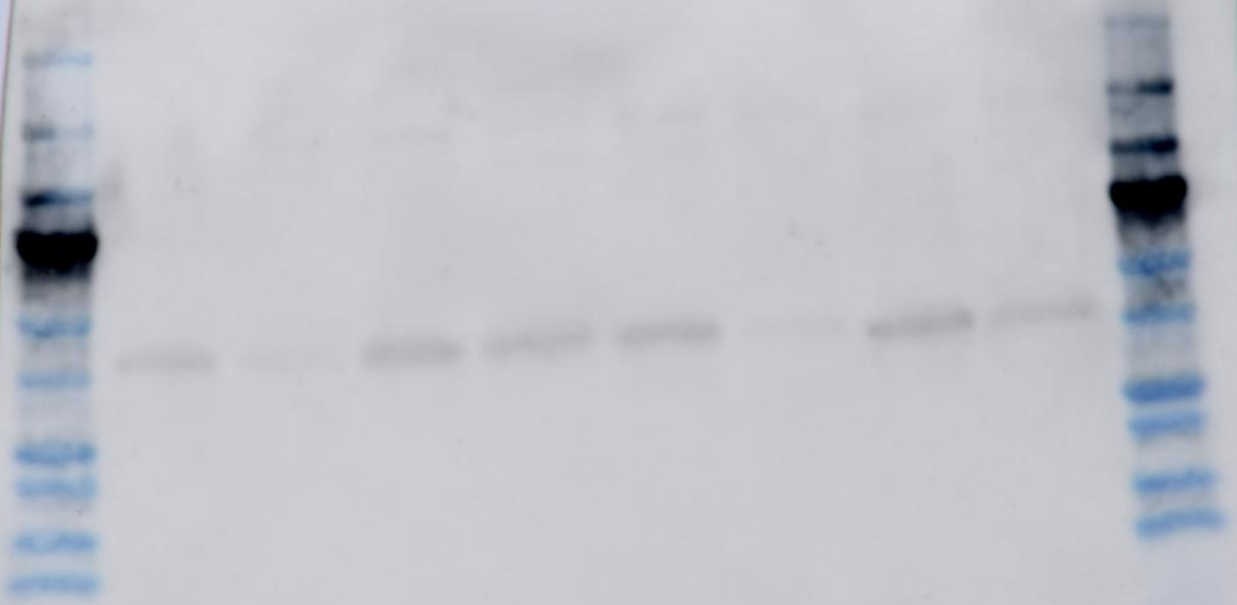

6

Supplement: pnas.2010199117.sd19.pdf [file pnas.2010199117.sd19.pdf]
